# Supplementary material for: 2D/2D Phosphorus-Doped g-C3N4/Bi2WO6 Direct Z-Scheme Heterojunction Photocatalytic System for Tetracycline Hydrochloride (TC-HCl) Degradation
Source: MDPI journal article supplement (doi:10.3390/ijerph192214935), 2022-11-13
Supplement: s1 [file s1]

## Supplementary Material

### **2D/2D Phosphorus-Doped g-C<sub>3</sub>N<sub>4</sub>/Bi<sub>2</sub>WO<sub>6</sub> Direct Z-Scheme Heterojunction Photocatalytic System for Tetracycline Hydrochloride (TC-HCl) Degradation**

Xudong Yin<sup>1,2</sup>, Xiaojie Sun<sup>1,\*</sup>, Dehao Li<sup>2,\*</sup>, Wenyu Xie<sup>2</sup>, Yufeng Mao<sup>2</sup>, Zhenghui Liu<sup>2</sup>, Zhisen Liu<sup>2</sup>

1 Guangxi Key Laboratory of Environmental Pollution Control Theory and Technology, College of Environmental Science and Engineering, Guilin University of Technology, Guilin 541006, China

2 Guangdong Provincial Key Laboratory of Petrochemical Pollution Processes and Control, Key Laboratory of Petrochemical Pollution Control of Guangdong Higher Education Institutes, School of Environmental Science and Engineering, Guangdong University of Petrochemical Technology, Maoming 525000, China

\* Correspondence:

sunxiaojie@glut.edu.cn (X.S.)

ldh@gdupt.edu.cn (D.L.)

**Table S1.** Feedstock dosage for each catalyst

| Photocatalysts | PCNS (g) | CNS (g) | Bi(NO <sub>3</sub> ) <sub>3</sub> ·5H <sub>2</sub> O (g) | Na <sub>2</sub> WO <sub>4</sub> ·2H <sub>2</sub> O (g) |
|----------------|----------|---------|----------------------------------------------------------|--------------------------------------------------------|
| 0.5%PCNS/BWO   | 0.0035   | 0       | 0.9701                                                   | 0.3299                                                 |
| 10%PCNS/BWO    | 0.0698   | 0       | 0.9701                                                   | 0.3299                                                 |
| 30%PCNS/BWO    | 0.2093   | 0       | 0.9701                                                   | 0.3299                                                 |
| 50%PCNS/BWO    | 0.3489   | 0       | 0.9701                                                   | 0.3299                                                 |
| 67%PCNS/BWO    | 0.4675   | 0       | 0.9701                                                   | 0.3299                                                 |
| BWO            | 0        | 0       | 0.9701                                                   | 0.3299                                                 |
| 30%CNS/BWO     | 0        | 0.2093  | 0.9701                                                   | 0.3299                                                 |

**Table S2.** Atomic percentage of different elements present in 30%PCNS/BWO samples

|     | C         | N    | O         | P    | W    | Bi        |
|-----|-----------|------|-----------|------|------|-----------|
| At% | 26.3<br>3 | 6.45 | 47.8<br>4 | 0.90 | 6.75 | 11.7<br>3 |

**Table S3.** Comparison with other BWO-based photocatalysts for the degradation of TC-HCl

| Photocatalysts                                                     | TC-HCl Concentration (mg/L) | Dosage (g/L) | Time (min) | Light source                  | Removal (%) | Kinetic Constant (min <sup>-1</sup> ) | References |
|--------------------------------------------------------------------|-----------------------------|--------------|------------|-------------------------------|-------------|---------------------------------------|------------|
| Co <sub>3</sub> O <sub>4</sub> /Ag/Bi <sub>2</sub> WO <sub>6</sub> | 10                          | 1.0          | 60         | 300 W xenon lamp (λ > 420 nm) | 57.2        | 0.0157                                | [1]        |
| 7-MIL-88B(Fe)/Bi <sub>2</sub> WO <sub>6</sub>                      | 10                          | 0.5          | 90         | 500 W xenon lamp (λ > 420 nm) | 96.4        | 0.0268                                | [2]        |
| 5%MIL-125(Ti)/Bi <sub>2</sub> WO <sub>6</sub>                      | 20                          | 0.4          | 80         | 300 W xenon lamp (λ > 400 nm) | 73.0        | 0.0184                                | [3]        |
| BiOCl/Bi <sub>2</sub> WO <sub>6</sub> -2                           | 20                          | 0.7          | 150        | 300 W xenon lamp (λ > 420 nm) | 63.9        | 0.0067                                | [4]        |
| Bi <sub>2</sub> WO <sub>6</sub> /BiOBr                             | 10                          | 0.2          | 90         | 300 W xenon lamp (λ > 420 nm) | 62.2        | /                                     | [5]        |
| Bi <sub>2</sub> WO <sub>6</sub> /Nb <sub>2</sub> CT <sub>x</sub>   | 15                          | 0.5          | 120        | 500 W xenon lamp (λ > 420 nm) | 83.1        | 0.0171                                | [6]        |
| 15%CuInS <sub>2</sub> /Bi <sub>2</sub> WO <sub>6</sub>             | 10                          | 0.3          | 120        | 300 W xenon lamp (λ > 420 nm) | 92.4        | 0.0176                                | [7]        |
| Bi <sub>2</sub> WO <sub>6</sub> /Ta <sub>3</sub> N <sub>5</sub>    | 20                          | 0.4          | 120        | 300 W xenon lamp (λ > 400 nm) | 86.7        | 0.0169                                | [8]        |
| g-C <sub>3</sub> N <sub>4</sub> /Bi <sub>2</sub> WO <sub>6</sub>   | 10                          | 0.4          | 60         | 300 W xenon lamp (λ > 420 nm) | ≈65.0       | 0.0177                                | [9]        |
| g-C <sub>3</sub> N <sub>4</sub> /Bi <sub>2</sub> WO <sub>6</sub>   | 10                          | 1.0          | 120        | 300 W xenon lamp (λ > 420 nm) | ≈64.0       | /                                     | [10]       |
| g-C <sub>3</sub> N <sub>4</sub> /Bi <sub>2</sub> WO <sub>6</sub>   | 20                          | 0.6          | 60         | 300 W xenon lamp (λ > 420 nm) | 76.25       | 0.02                                  | [11]       |
| 30%CNS/BWO                                                         | 20                          | 0.2          | 60         | 300 W xenon lamp (λ > 420 nm) | 62.1        | 0.0164                                | This work  |
| 30%PCNS/BWO                                                        | 20                          | 0.2          | 60         | 300 W xenon lamp (λ > 420 nm) | 76.7        | 0.0266                                | This work  |

5 #2481 RT: 7.80 AV: 1 NL: 3.06E6

F: FTMS + p ESI d Full ms2 459.1387@hcd20.00 [50.0000-485.0000]

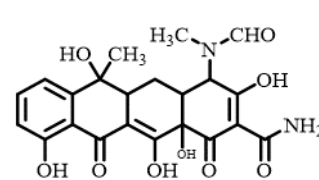

5 #2351 RT: 7.41 AV: 1 NL: 1.40E6

F: FTMS + p ESI d Full ms2 433.1595@hcd20.00 [50.0000-460.0000]

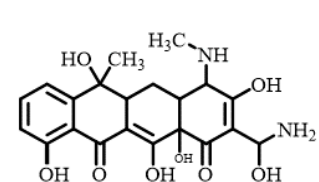

5 #2385 RT: 7.51 AV: 1 NL: 2.17E6

F: FTMS + p ESI d Full ms2 417.1646@hcd20.00 [50.0000-445.0000]

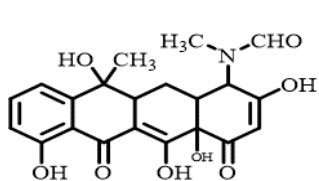

5#4510 RT: 13.88 AV: 1 NL: 5.16E5  
F: FTMS + p ESI d Full ms2 403.2294@hcd20.00 [50.0000-430.0000]

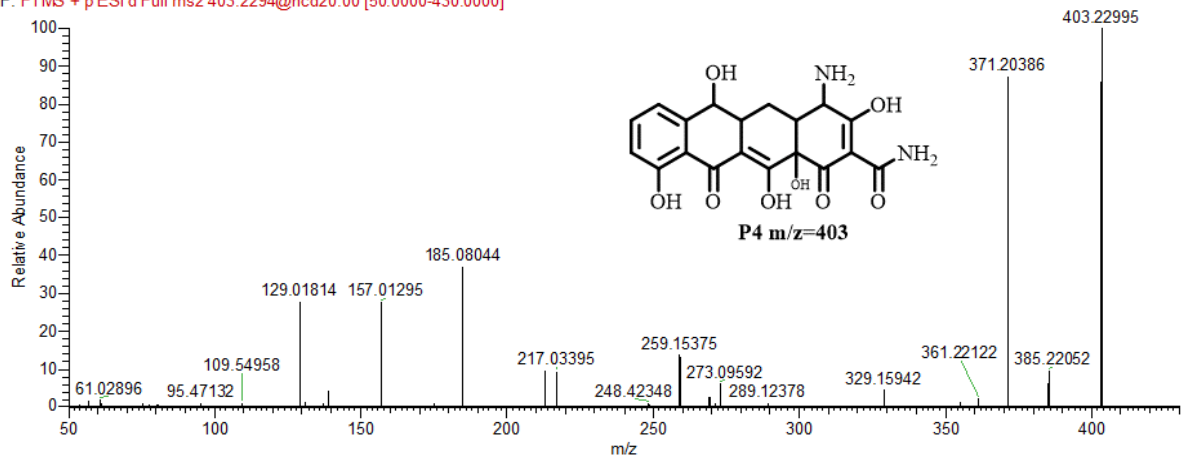

5#2482 RT: 7.80 AV: 1 NL: 1.70E6  
F: FTMS + p ESI d Full ms2 399.1538@hcd20.00 [50.0000-425.0000]

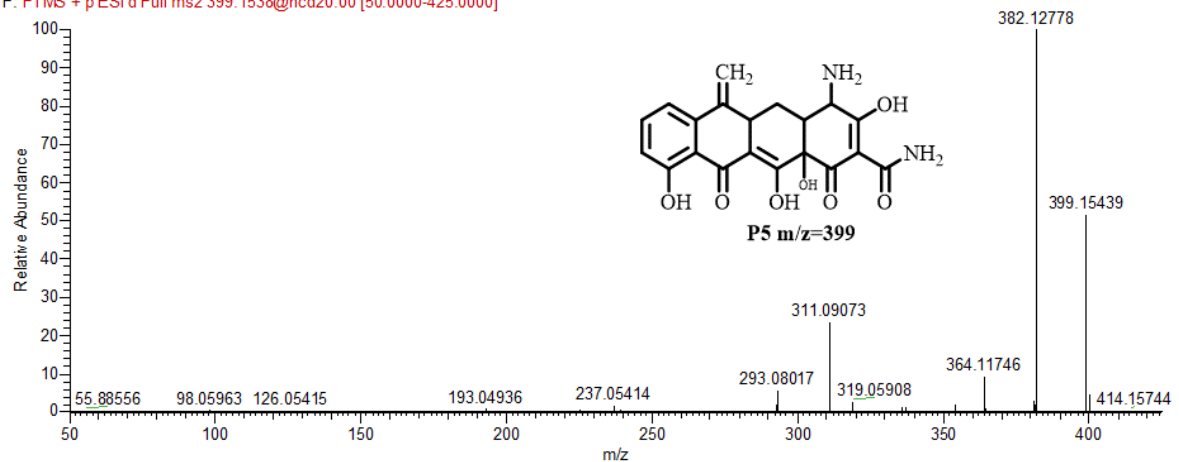

5#3847 RT: 11.91 AV: 1 NL: 7.47E6  
F: FTMS + p ESI d Full ms2 282.2030@hcd20.00 [50.0000-305.0000]

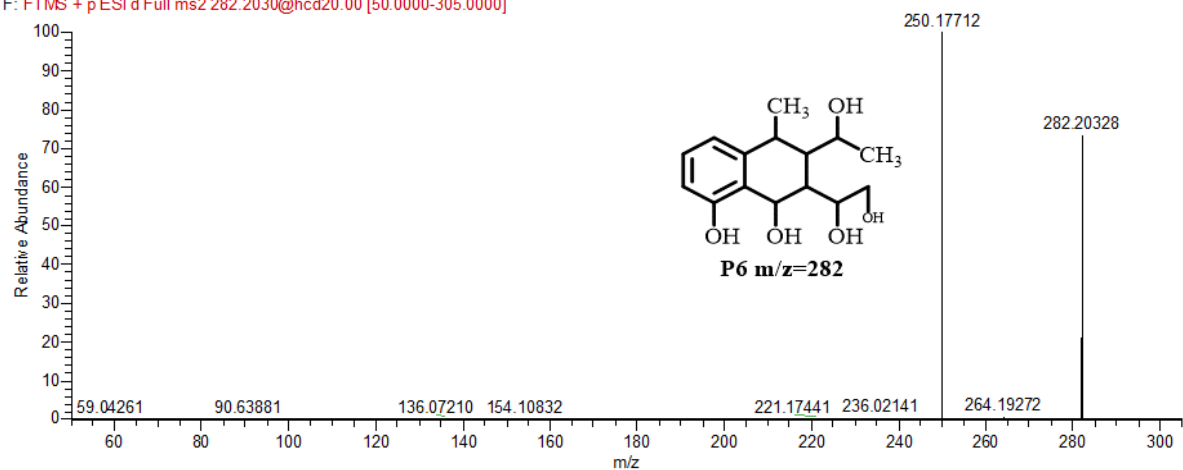

5 #2974 RT: 9.28 AV: 1 NL: 4.01E5  
F: FTMS + p ESI d Full ms2 277.0674@hcd20.00 [50.0000-300.0000]

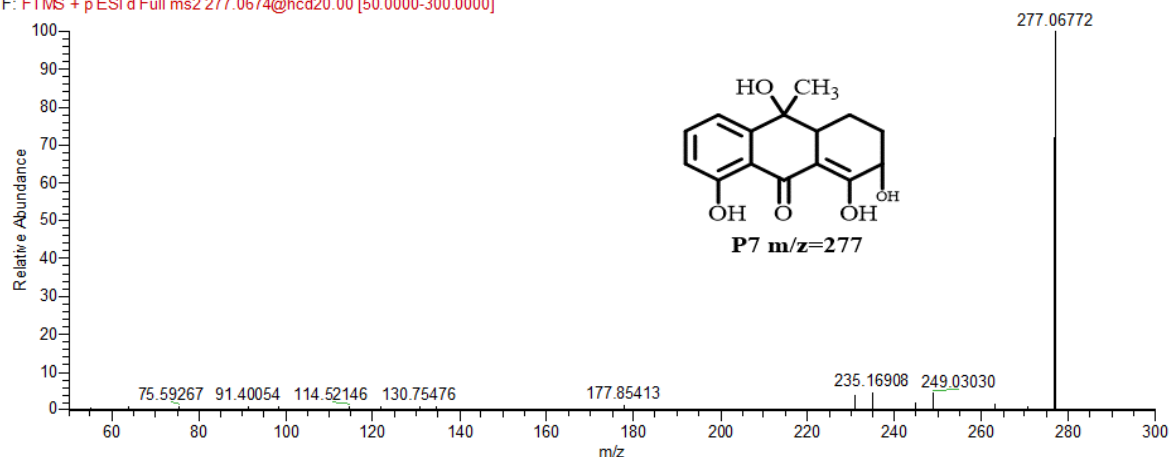

5 #2793 RT: 8.74 AV: 1 NL: 3.20E6  
F: FTMS + p ESI d Full ms2 242.1532@hcd20.00 [50.0000-265.0000]

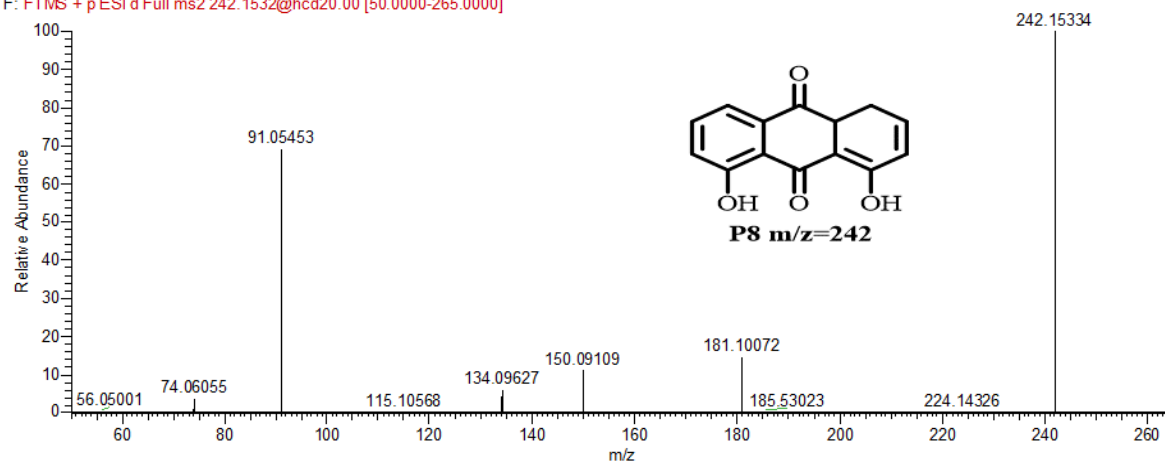

5 #4053 RT: 12.52 AV: 1 NL: 2.46E6  
F: FTMS + p ESI d Full ms2 231.1349@hcd20.00 [50.0000-255.0000]

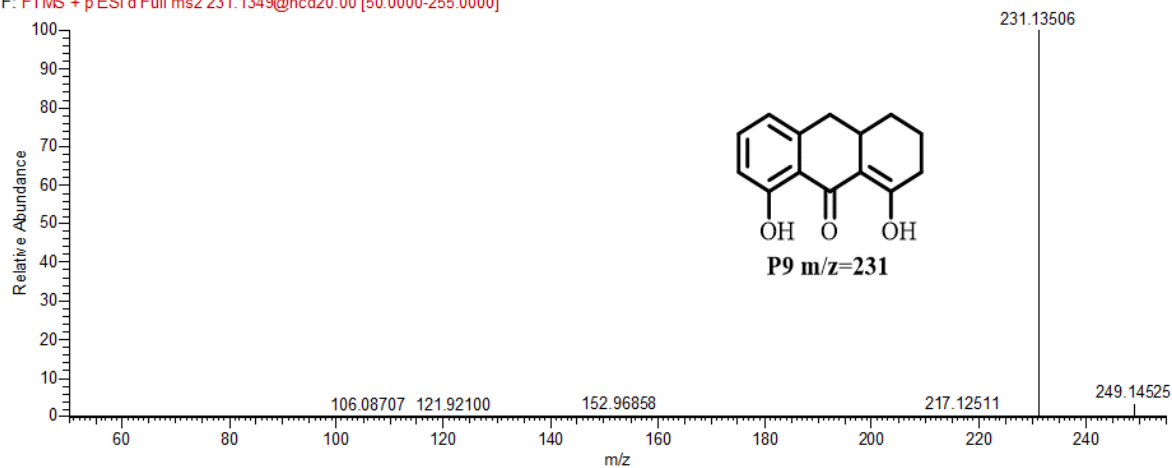

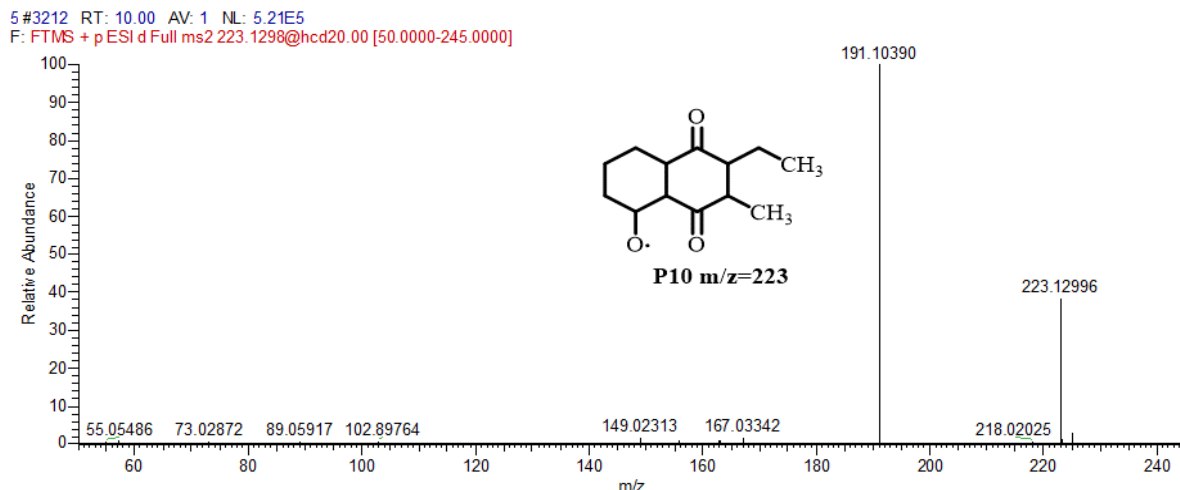

**Figure S1.** HRAMLC-MS/MS secondary ion mass spectra of TC-HCl photocatalytic degradation products

## References

1. Wan, J.; Xue, P.; Wang, R.M.; Liu, L.; Liu, E.Z.; Bai, X.; Fan, J.; Hu, X.Y. Synergistic effects in simultaneous photocatalytic removal of Cr (VI) and tetracycline hydrochloride by Z-scheme  $\text{Co}_3\text{O}_4/\text{Ag}/\text{Bi}_2\text{WO}_6$  heterojunction. *Appl. Surf. Sci.* **2019**, *483*, 677-687.
2. Hu, P.B.; Yao, C.F.; Yang, L.; Xin, Y.M.; Miao, Y.Q. Boosted photodegradation of tetracycline hydrochloride over Z-scheme MIL-88B (Fe)/ $\text{Bi}_2\text{WO}_6$  composites under visible light. *Colloids Surf. Physicochem. Eng. Aspects* **2021**, *627*, 127248.
3. Yin, S.; Chen, Y.; Gao, C.; Hu, Q.S.; Li, M.; Ding, Y.; Di, J.; Xia, J.X.; Li, H.M. In-situ preparation of MIL-125(Ti)/ $\text{Bi}_2\text{WO}_6$  photocatalyst with accelerating charge carriers for the photodegradation of tetracycline hydrochloride. *J. Photochem. Photobiol. A: Chem.* **2020**, *387*, 112149.
4. Peng, R.F.; Kang, Y.X.; Deng, X.H.; Zhang, X.M.; Xie, F.; Wang, H.Y.; Liu, W.W., Topotactic transformed face-to-face heterojunction of  $\text{BiOCl}/\text{Bi}_2\text{WO}_6$  for improved tetracycline photodegradation. *J. Environ. Chem. Eng.* **2021**, *9*, 106750.
5. Ren, X.Z.; Wu, K.; Qin, Z.G.; Zhao, X.C.; Yang, H. The construction of type II heterojunction of  $\text{Bi}_2\text{WO}_6/\text{BiOBr}$  photocatalyst with improved photocatalytic performance. *J. Alloy. Compd.* **2019**, *788*, 102-109.
6. Cui, C.; Guo, R.H.; Xiao, H.Y.; Ren, E.H.; Song, Q.S.; Xiang, C.; Lai, X.X.; Lan, J.W.; Jiang, S.X.  $\text{Bi}_2\text{WO}_6/\text{Nb}_2\text{CT}_x$  MXene hybrid nanosheets with enhanced visible-light-driven photocatalytic activity for organic pollutants degradation. *Appl. Surf. Sci.* **2020**, *505*, 144595.
7. Lu, X.Y.; Che, W.J.; Hu, X.F.; Wang, Y.; Zhang, A.T.; Deng, F.; Luo, S.L.; Dionysiou, D. D. The facile fabrication of novel visible-light-driven Z-scheme  $\text{CuInS}_2/\text{Bi}_2\text{WO}_6$  heterojunction with intimate interface contact by in situ hydrothermal growth strategy for extraordinary photocatalytic performance. *Chem. Eng. J.* **2019**, *356*, 819-829.
8. Li, S.J.; Chen, J.L.; Hu, S.W.; Wang, H.L.; Jiang, W.; Chen, X.B. Facile construction of novel  $\text{Bi}_2\text{WO}_6/\text{Ta}_3\text{N}_5$  Z-scheme heterojunction nanofibers for efficient degradation of harmful pharmaceutical pollutants.

*Chem. Eng. J.* **2020**, *402*, 126165.

9.Jia, J.K.; Zhang, X.R.; Jiang, C.Y.; Huang, W.X.; Wang, Y.P. Visible-light-driven nitrogen-doped carbon quantum dots decorated g-C<sub>3</sub>N<sub>4</sub>/Bi<sub>2</sub>WO<sub>6</sub> Z-scheme composite with enhanced photocatalytic activity and mechanism insight. *J. Alloy. Compd.* **2020**, *835*, 155180.

10.Chen, F.; Li, D.; Luo, B.F.; Chen, M.; Shi, W.D. Two-dimensional heterojunction photocatalysts constructed by graphite-like C<sub>3</sub>N<sub>4</sub> and Bi<sub>2</sub>WO<sub>6</sub> nanosheets: enhanced photocatalytic activities for water purification. *J. Alloy. Compd.* **2017**, *694*, 193-200.

11.Xue, W.J.; Huang, D.L.; Li, J.; Zeng, G.M.; Deng, R.; Yang, Y.; Chen, S.; Li, Z.H.; Gong, X.M.; Li, B. Assembly of AgI nanoparticles and ultrathin g-C<sub>3</sub>N<sub>4</sub> nanosheets codecorated Bi<sub>2</sub>WO<sub>6</sub> direct dual Z-scheme photocatalyst: an efficient, sustainable and heterogeneous catalyst with enhanced photocatalytic performance. *Chem. Eng. J.* **2019**, *373*, 1144-1157.
